# Supplementary material
Source: publisher figshare collection journal article supplement (https://adisjournals.figshare.com/ndownloader/files/33907481)
Supplement: Supplementary file 1 [file 33907481]

# Cost of End-of-Life Inpatient Encounters in Patients with Chronic Kidney Disease in the United States: A Report from the DISCOVER CKD Retrospective Cohort

Real-world data reporting HCRU and costs associated with end-of-life care for patients with CKD are limited; these data will facilitate better healthcare delivery in the future

## STUDY DESIGN

### A DISCOVER CKD retrospective cohort study

#### Data source

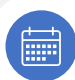

US Premier Hospital  
Database  
Jan 2016–Mar 2020

#### Eligibility criteria

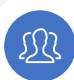

- ≥18 years
- ICD-10 code (Stage 3–5 CKD/kidney failure)

#### Outcomes

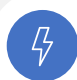

Encounters ending  
in death

#### Reason for encounter (ICD-10 code)

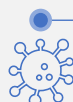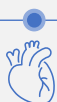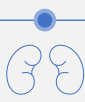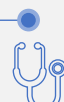

Infection

CV

Kidney  
failure

Other

#### Insurer

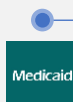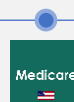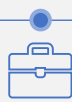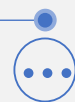

Medicaid

Medicare

Commercial

Other

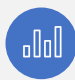

Total cost and length of hospitalisation per encounter calculated

## RESULTS

**237,734**

encounters ending in death

#### Reasons for Encounter

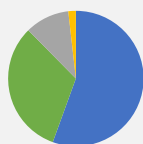

**Infection**  
32.1% (n = 76,307)

**CV**  
10.6% (n = 25,118)

**Kidney failure**  
1.8% (n = 4210)

**Other**  
55.6% (n = 132,099)

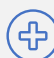

#### Duration

(mean range [days])  
of hospitalisation per  
encounter

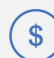

#### Cost

(median [IQR])  
per encounter

#### Most common reason for encounter\*

**8.7–12.7 days**

**\$16,403** (\$7762–34,910)

**7.5–10.5 days**

**\$17,503** (7766–39,693)

#### Highest costs and longest hospital stays

**10.7–15.9 days**

**\$18,469** (\$8673–38,315)

NR

NR

#### Highest cost of all insurers

Median (IQR): **\$16,189** (\$7725–33,443)

**Conclusion:** End-of-life encounters were most frequently related to infection. Kidney-failure-related encounters were associated with the longest hospital stays and the highest costs compared with CV and infection.

Carol Pollock, Glen James, Juan Jose Garcia Sanchez, Matthew Arnold, Juan-Jesus Carrero, Carolyn S.P. Lam, Hungta Chen, Stephen Nolan, Roberto Pecoits-Filho  
*Advances in Therapy* (2021) @AdvancesTherapy

\*Among the specific three reasons for encounter assessed. CKD, chronic kidney disease; CV, cardiovascular; ICD-10, international classification of diseases, tenth revision; HCRU, healthcare resource utilisation; IQR, interquartile range; NR, not reported; US, United States.
